# Supplementary material
Source: PubMed Central journal article supplement (PMC2705828)

Suppl. Figure 3

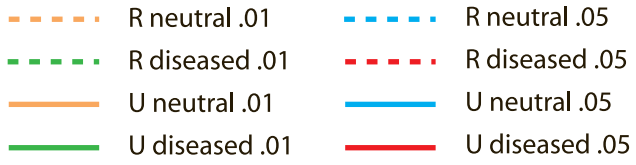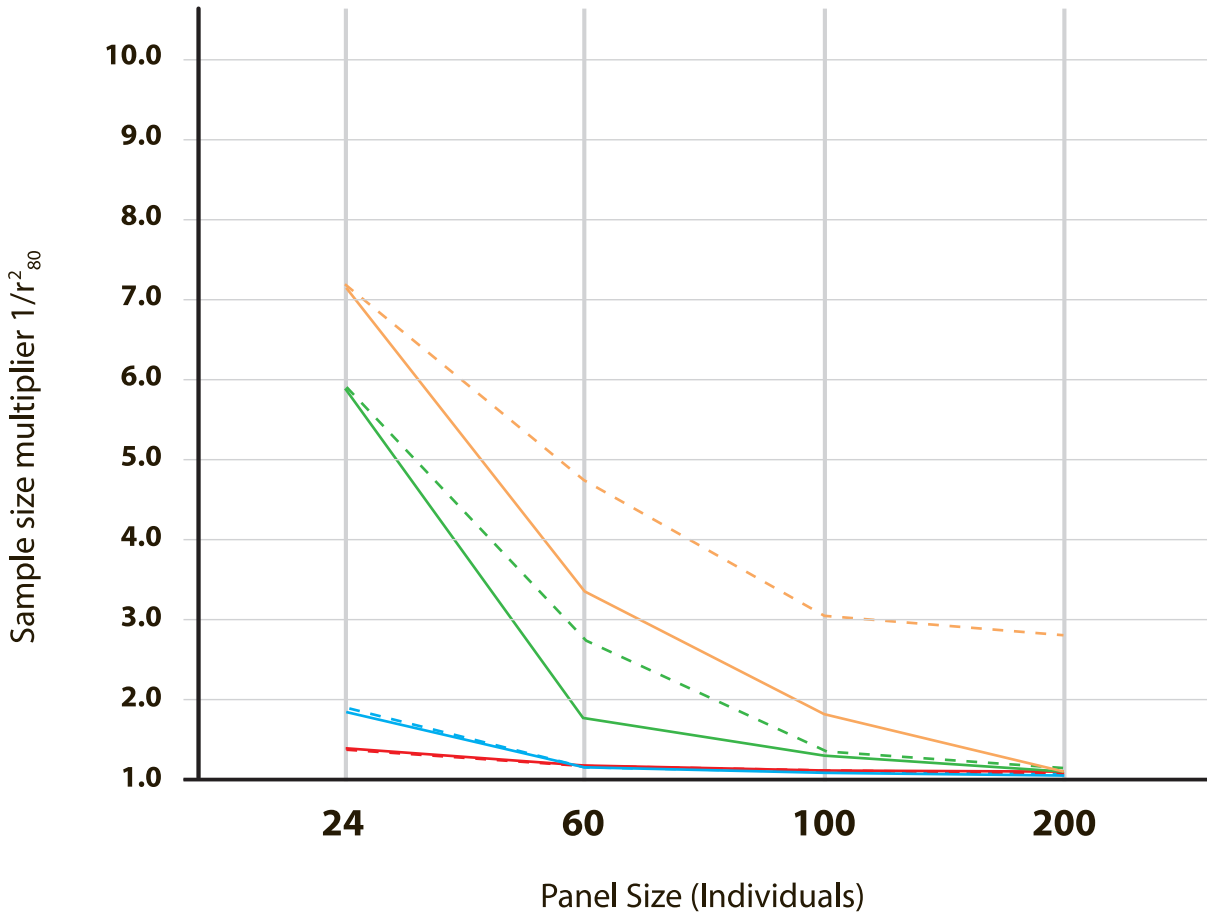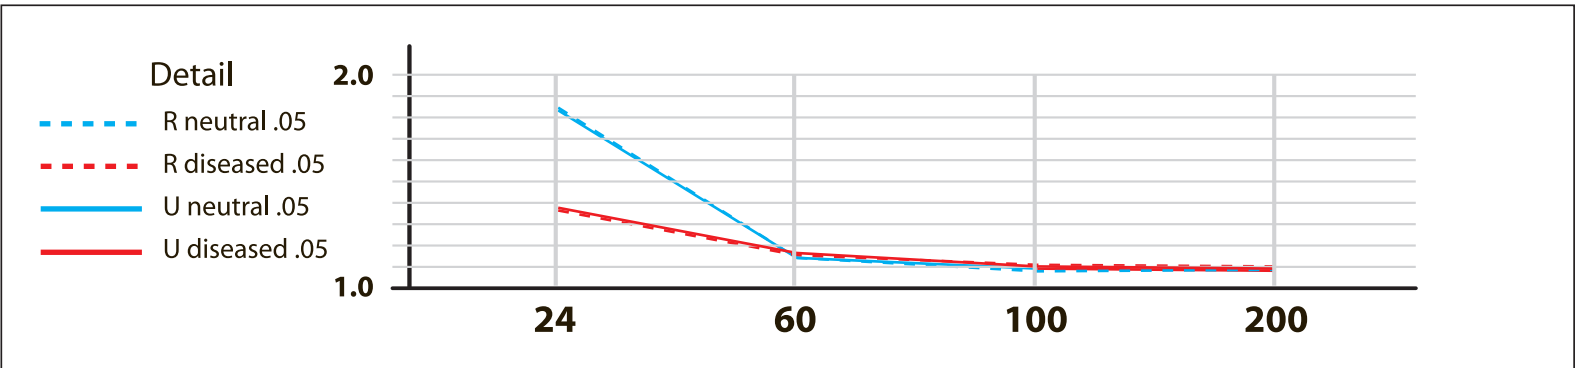

Supplement: NIHMS74296-supplement-Supp_Fig_s3.pdf [file NIHMS74296-supplement-Supp_Fig_s3.pdf]
